# Supplementary material
Source: PubMed Central journal article supplement (PMC3637662)
Supplement: NIHMS407561-supplement-Supplementary.pdf [file NIHMS407561-supplement-Supplementary.pdf]

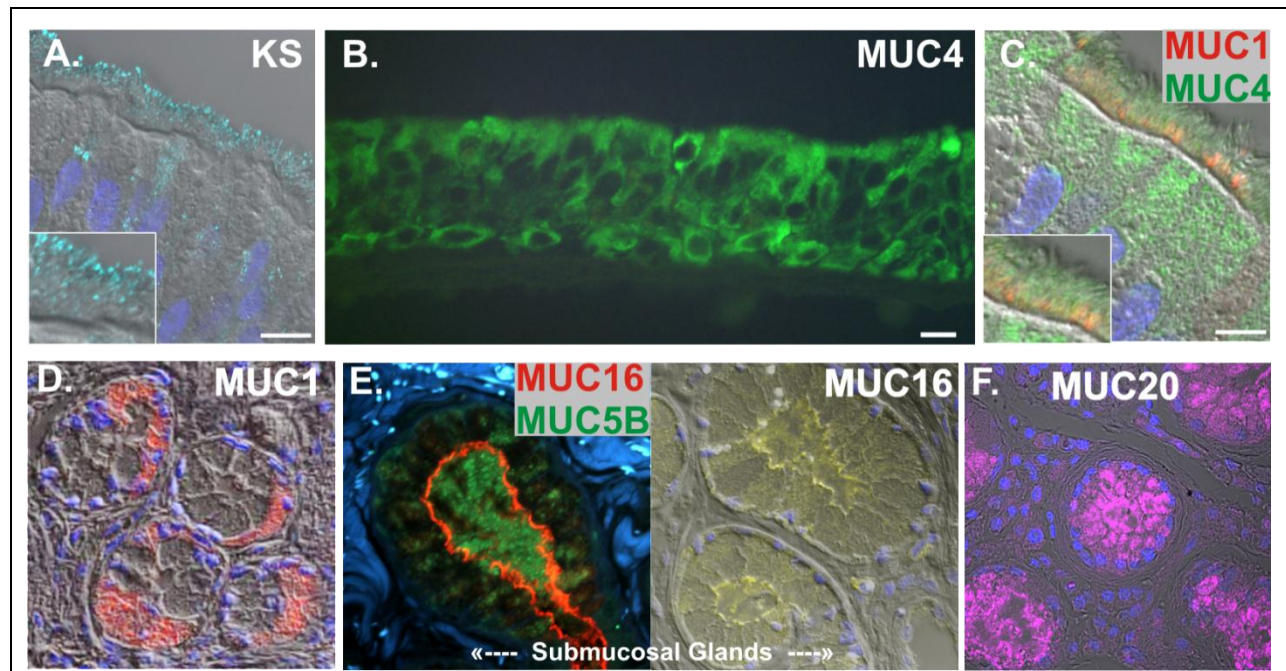

**Supplemental Figure S1. KS and tethered mucins expressed in airway epithelia. *Panels A-C. KS, MUC4, and MUC1 expression in superficial epithelia.*** Panel A, human bronchus probed with a KS antibody. Panel B, HTBE cell culture probed with a MUC4 antibody targeting the VNTR domain, which detects the mucin selectively in the ER. Panel C, human bronchus probed with antibodies targeting extracellular epitopes in non-glycosylated domains of MUC1 (red) and MUC4 (green). ***Panels D-F, MUC1, MUC16, and MUC20 expression in submucosal glands of human bronchus.*** Panel D, a cross-section through gland acini probed for MUC1; DIC + fluorescence, DAPI counterstain. Panel E, longitudinal section (left, fluorescence only) and cross-section (right, DIC + fluorescence) through mucous acini probed for MUC5B and/or MUC16, as indicated, using antibodies as in Figure 5. Panel F, a cross-section through mucous acini probed for MUC20, DIC + fluorescence, DAPI counterstain. Scale bars = 10  $\mu$ m.

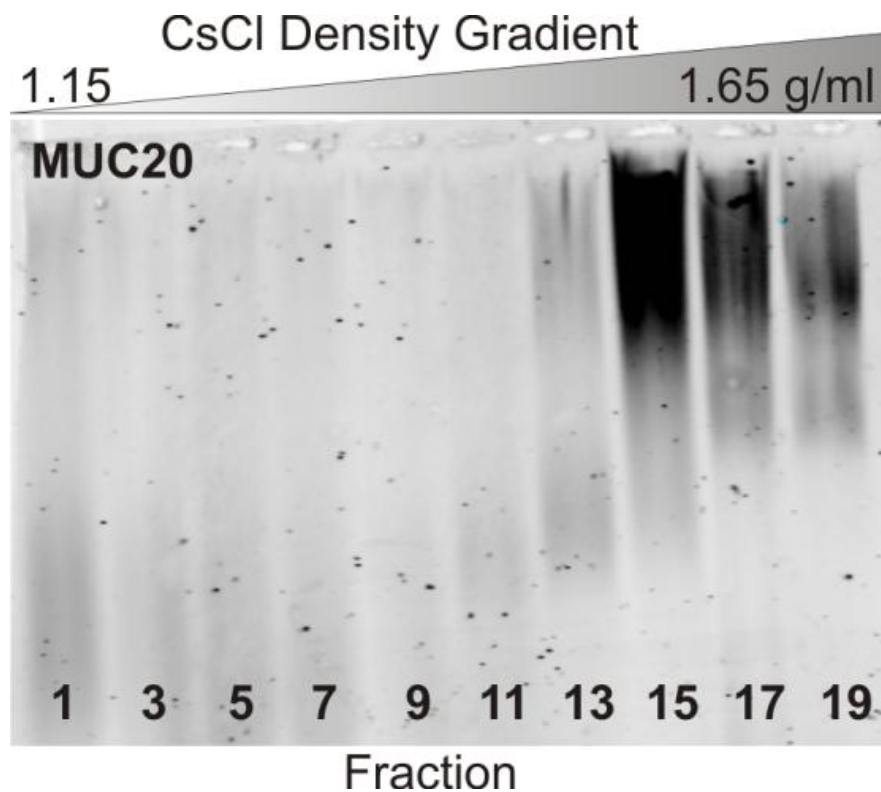

**Supplemental Figure S2. Agarose Western Blot showing CsCl gradient fractions probed for antibody to MUC20.** HTBE cell culture secretions were solubilized in GuHCl and separated on a CsCl density gradient similar to the one shown in Figure 3. Subsamples of alternate fractions were further separated by electrophoresis on 1% agarose, transferred by vacuum blotting to nitrocellulose, and probed with a polyclonal antibody to MUC20.

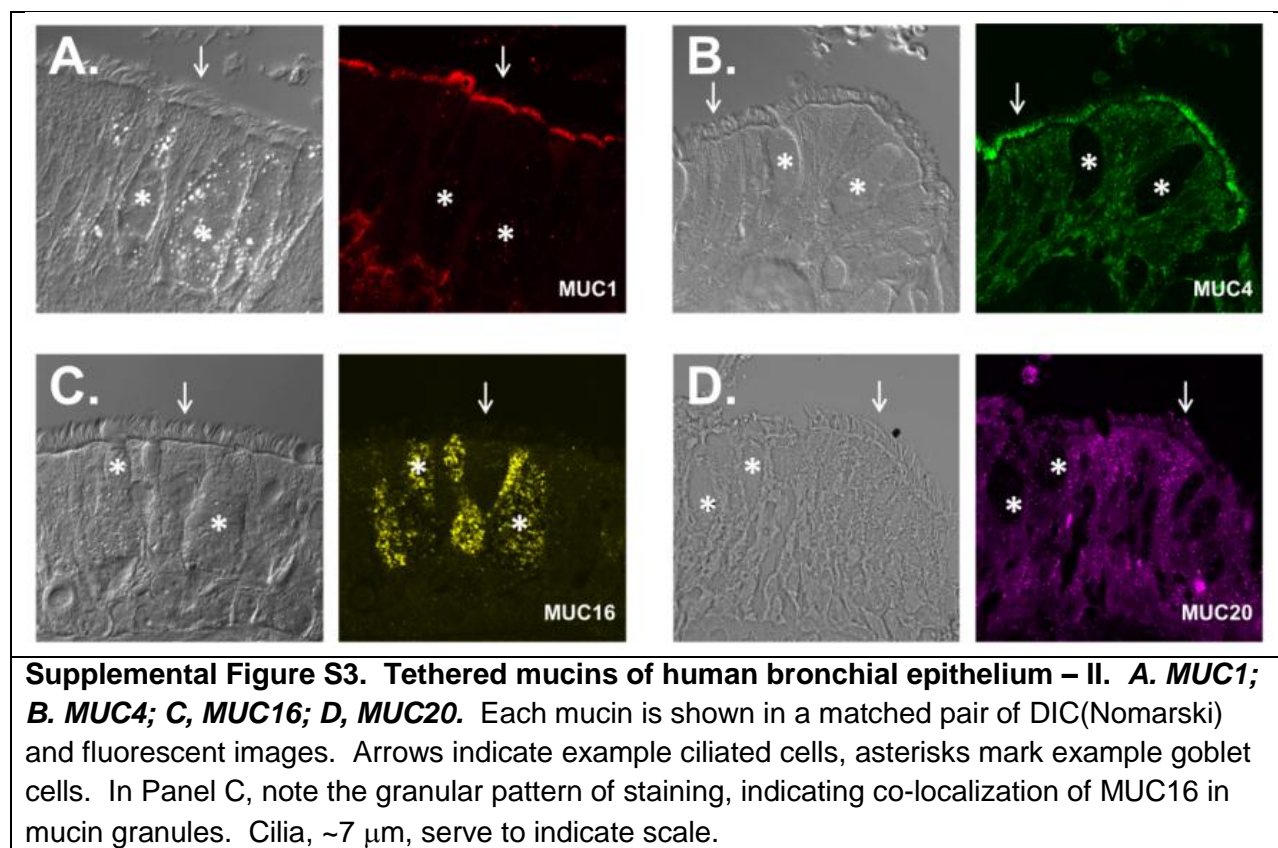

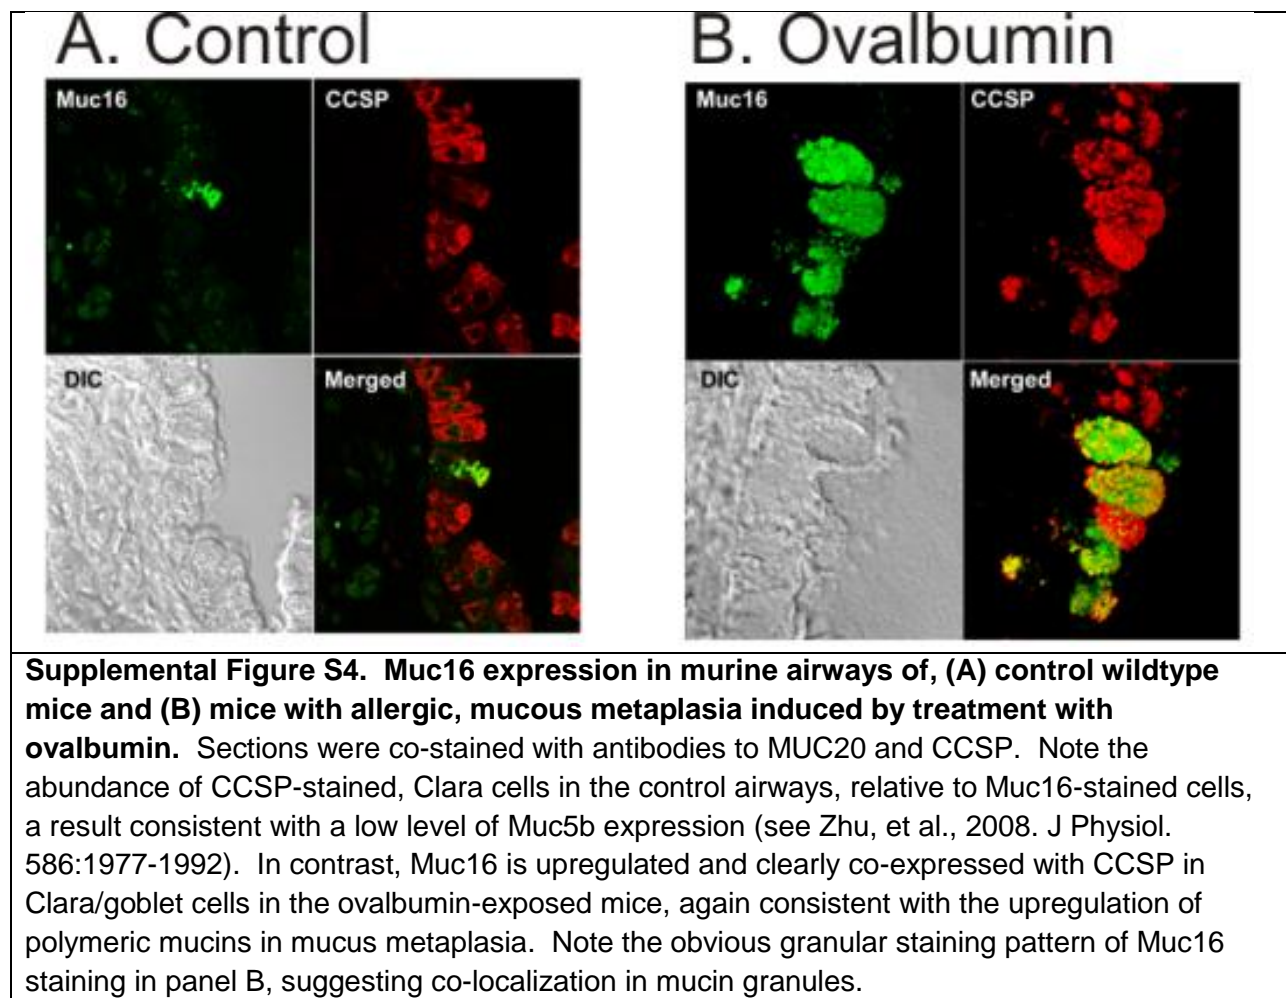

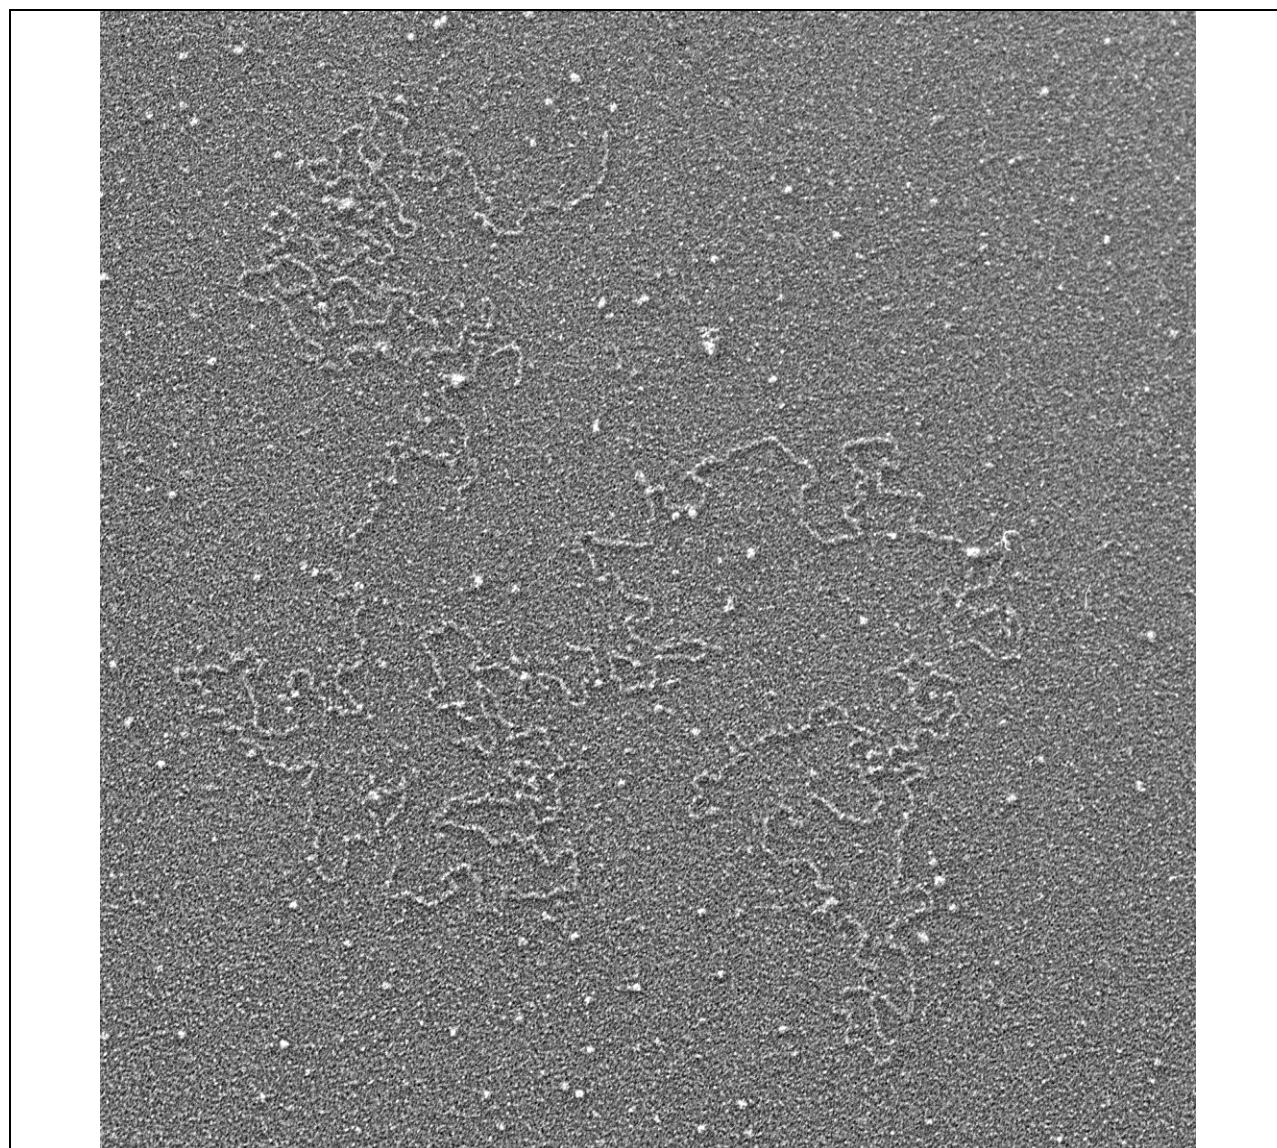

**Supplemental Figure S5. Electron micrograph of the linearized form of MUC5B.** Sample prepared as for Figure 4. For more images and details on the linearization/maturation of polymeric mucins, see Kesimer, et al., 2010, Am J Physiol 298:L15-22 (Reference # 18).

### A. Mouse Cilia, Ruthenium Red

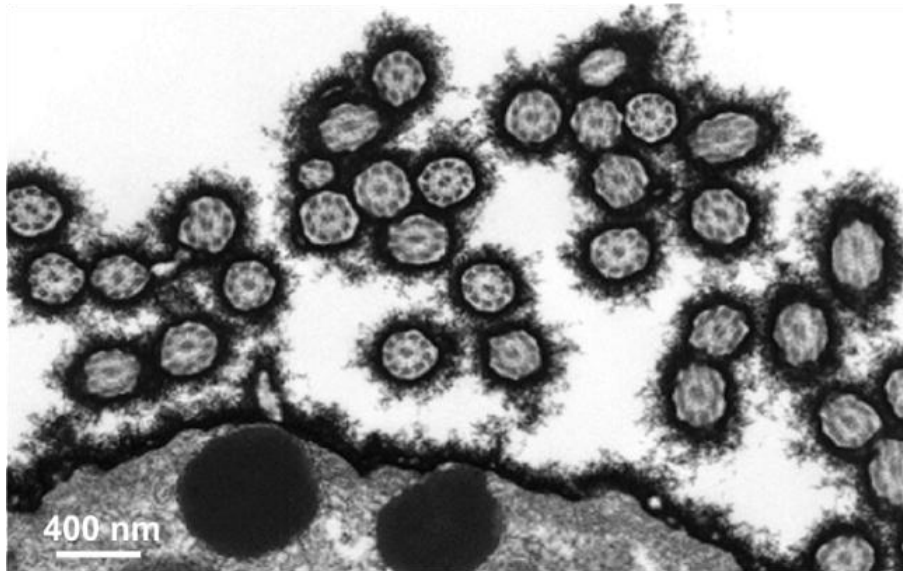

**Supplemental Figure S6. Mucosal glycocalyx of mouse airways visualized by conventional EM and ruthenium red staining.** The image shows cilia in cross-section, projected over the surface of a Clara cell.
